# Supplementary material for: From Bowen disease to cutaneous squamous cell carcinoma: eight markers were verified from transcriptomic and proteomic analyses
Source: Springer Nature journal article supplement (doi:10.1186/s12967-022-03622-1), 2022-09-09
Supplement: MOESM1 [file 23471940]

Supplemental Table 1. The clinical characteristics of 6 enrolled individuals for independent verification.

| Groups                | Case   | Age, years | Gender | Tissue locations | TNM staging  |
|-----------------------|--------|------------|--------|------------------|--------------|
| CSCC (n=2)            | Case 1 | 67         | Male   | Cheek            | pT2 pN1 M0   |
|                       | Case 2 | 74         | Male   | Cheek            | pT2 pN1 M1   |
| Bowen disease (n=2)   | Case 1 | 75         | Male   | Cheek            | Primary CSCC |
|                       | Case 2 | 69         | Female | Cheek            | Primary CSCC |
| Healthy control (n=2) | Case 1 | 68         | Male   | Cheek            | —            |
|                       | Case 2 | 65         | Female | Limbs            | —            |
| Statistics value      | —      | 1.032      | 1.500  | 2.400            | —            |
| <i>P</i> value        | —      | 0.456      | 0.472  | 0.301            | —            |

Noted: The “—” indicated no value.
