# Supplementary material for: From Bowen disease to cutaneous squamous cell carcinoma: eight markers were verified from transcriptomic and proteomic analyses
Source: Springer Nature journal article supplement (doi:10.1186/s12967-022-03622-1), 2022-09-09
Supplement: MOESM2 [file 23471940]

Supplemental Table 2. The significantly enriched 8 KEGG pathways based on the differentially expressed proteins (Bowen disease vs. healthy control)

| CSCC vs. healthy control                  |                       |                              |
|-------------------------------------------|-----------------------|------------------------------|
| KEGG pathway                              | <i>P</i> value        | $-\log_{10}(\text{p value})$ |
| hsa04512 ECM-receptor interaction         | $2.27 \times 10^{-6}$ | 5.64                         |
| hsa04974 Protein digestion and absorption | $5.68 \times 10^{-5}$ | 4.25                         |
| hsa04151 PI3K-Akt signaling pathway       | <0.001                | 3.37                         |
| hsa05165 Human papillomavirus infection   | <0.001                | 3.35                         |
| hsa03050 Proteasome                       | <0.001                | 3.35                         |
| hsa00360 Phenylalanine metabolism         | <0.001                | 3.31                         |
| hsa04510 Focal adhesion                   | 0.002                 | 2.61                         |
| hsa00970 Aminoacyl-tRNA biosynthesis      | 0.003                 | 2.46                         |
