# Supplementary material for: From Bowen disease to cutaneous squamous cell carcinoma: eight markers were verified from transcriptomic and proteomic analyses
Source: Springer Nature journal article supplement (doi:10.1186/s12967-022-03622-1), 2022-09-09
Supplement: MOESM3 [file 23471940]

Supplemental Table 3. The TNC, FSCN1, SERPINB1, ACTN1, RAB31, COL3A1, COL1A1, and CD36 mRNA values in CSCC relative to healthy control in GSE32628.

| ID           | Gene     | Adjusted <i>P</i> value | Log FC |
|--------------|----------|-------------------------|--------|
| ILMN_1719759 | TNC      | 6.39E-10                | 2.38   |
| ILMN_1808707 | FSCN1    | 6.91E-11                | 2.19   |
| ILMN_1769759 | SERPINB1 | 2.02E-06                | 2.34   |
| ILMN_1798892 | ACTN1    | 4.32E-11                | 2.32   |
| ILMN_1660691 | RAB31    | 7.88E-12                | 2.18   |
| ILMN_1773079 | COL3A1   | 8.91E-07                | 2.03   |
| ILMN_1701308 | COL1A1   | 2.20E-09                | 2.84   |
| ILMN_1784863 | CD36     | 3.66E-06                | 2.06   |
